# Supplementary material for: Ethyl acetate as solvent for the synthesis of poly(2-ethyl-2-oxazoline)
Source: Royal Society of Chemistry journal article supplement (doi:10.1039/c9gc03872h), 2020-01-01
Supplement: c9gc03872h1.pdf [file c9gc03872h1.pdf]

## Supporting information:

### Ethyl acetate as solvent for the synthesis of poly(2-ethyl-2-oxazoline)

Maarten Vergaelen,<sup>a</sup> Bart Verbraeken,<sup>a</sup> Joachim F. R. Van Guyse,<sup>a</sup> Annelore Podevyn,<sup>a</sup> Ali Tigrine,<sup>a</sup> Victor R. de la Rosa<sup>a</sup>, Bryn D. Monnery<sup>a, b</sup> and Richard Hoogenboom<sup>a, \*</sup>

<sup>a</sup>. *Supramolecular Chemistry Group, Centre of Macromolecular Chemistry (CMaC), Department of Organic and Macromolecular Chemistry, Ghent University, Krijgslaan 281-S4, 9000 Ghent, Belgium; \*Richard.Hoogenboom@ugent.be.*

<sup>b</sup>. *Polymer Reaction Design Group, Department of Organic and Bio- Polymer Chemistry, Hasselt University, Agoralaan Gebouw D, 3590, Belgium*

This supporting information document includes the tables from the experimental part depicted in the article entitled, Ethyl acetate as green solvent for the synthesis of poly(2-ethyl-2-oxazoline).

**SI Table 1:** Reprint of table 5 from ref 1 including highlighted solvents ranked according to recommendation in medical products and the possibility to retract the solvent from renewable sources. Reprinted with permission from ref 1.

**Table 5 A modified version of the conclusion to the survey of solvent selection guides [57]**

| Category                              | Bio-based                           | Can be sourced renewably                                                                | Potential biomass feedstock                                                                                                                                     | Not bio-based                                                                                                                                               |
|---------------------------------------|-------------------------------------|-----------------------------------------------------------------------------------------|-----------------------------------------------------------------------------------------------------------------------------------------------------------------|-------------------------------------------------------------------------------------------------------------------------------------------------------------|
| Recommended                           | Ethanol (4) <sup>a</sup><br>Water   | 1-Butanol<br>Ethyl acetate (2) <sup>a</sup>                                             | 1-Butyl acetate<br>Isopropanol (1) <sup>a</sup><br>Isopropyl acetate                                                                                            | Anisole<br>Sulpholane                                                                                                                                       |
| Inbetween recommended and problematic |                                     | Acetic acid (9) <sup>a</sup><br>Acetone<br>Ethylene glycol<br>Methanol (3) <sup>a</sup> | Acetic anhydride<br>t-Butanol<br>Methyl acetate<br>MIBK                                                                                                         | Benzyl alcohol<br>Cyclohexanone<br>MEK                                                                                                                      |
| Problematic                           | DMSO {12 %} <sup>b</sup><br>2-MeTHF |                                                                                         |                                                                                                                                                                 | Acetonitrile (10) <sup>a</sup><br>PhCl {2 %} <sup>b</sup><br>DMPU<br>Heptane (5) <sup>a</sup><br>Methylcyclohexane<br>Toluene (7) <sup>a</sup><br>Xylene(s) |
| Inbetween problematic and hazardous   |                                     | THF (6) <sup>a</sup>                                                                    | Formic acid<br>TBME                                                                                                                                             | Cyclohexane<br>DCM (8) <sup>a</sup> {48 %} <sup>b</sup><br>Pyridine                                                                                         |
| Hazardous                             |                                     | Triethylamine                                                                           | 1,4-Dioxane {0 %} <sup>b</sup><br>1,2-DME {6 %} <sup>b</sup><br>DMAc {12 %} <sup>b</sup><br>DMF {31 %} <sup>b</sup><br>Methoxyethanol<br>NMP {9 %} <sup>b</sup> | Diisopropyl ether {7 %} <sup>b</sup><br>n-Hexane {14 %} <sup>b</sup><br>Pentane                                                                             |
| Highly hazardous                      |                                     |                                                                                         | Diethyl ether {3 %} <sup>b</sup>                                                                                                                                | Benzene<br>Chloroform {2 %} <sup>b</sup><br>Carbon tetrachloride<br>1,2-DCE {4 %} <sup>b</sup><br>Nitromethane                                              |

<sup>a</sup> The ranking of the top ten solvents used by GSK in pilot plant operations in 2005 have been provided in parentheses, excluding water [7]

<sup>b</sup> Usage of solvents of concern and dipolar aprotic solvents as reported in *Organic Process Research and Development* between 1997 and 2012, presented as the percentage of papers containing reactions performed in each solvent [8]. Data is not available for greener solvents

**SI Table 2:** Calculations for the kinetic study for the homopolymerization of EtOx in different solvents.

| M    | [M]/[I] | [M]   | V <sub>stock,tot</sub> | [I]   | Vol (I) | Vol (M) | V(s) |
|------|---------|-------|------------------------|-------|---------|---------|------|
| name | ratio   | mol/L | mL                     | mol/L | mL      | mL      | mL   |
| EtOx | 100     | 3     | 45                     | 0.03  | 0.210   | 13.7    | 31.1 |

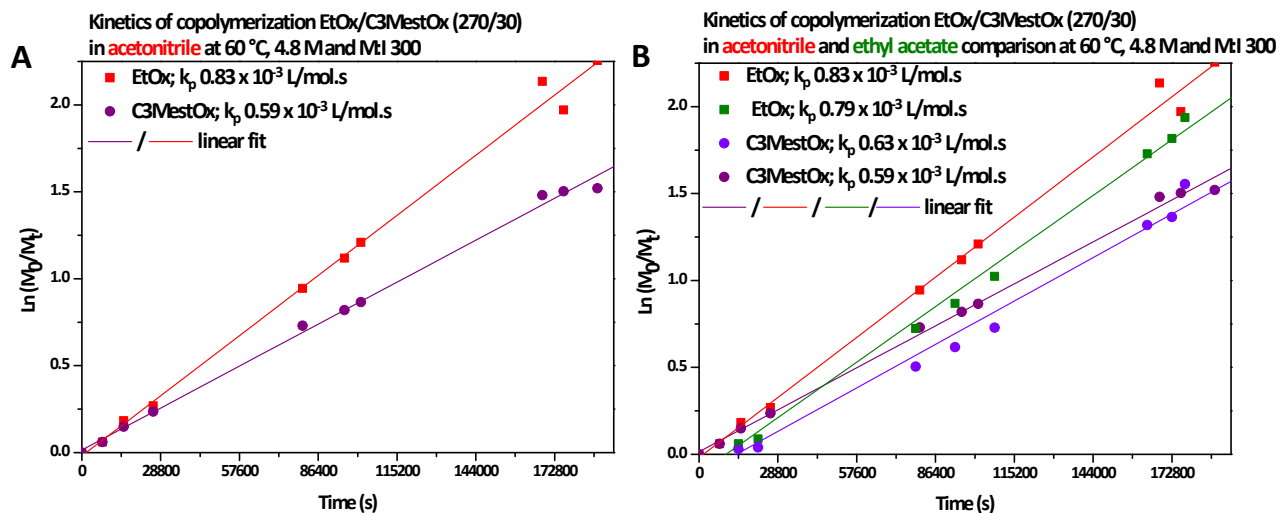

**SI Figure 1.** Copolymerization kinetic data plots for the CROP of EtOx and C3MestOx in acetonitrile (**A**) and the combined first order kinetic plot for the copolymerization CROP of EtOx and C3MestOx in acetonitrile and C3MestOx giving similar  $k_p$ 's (**B**).

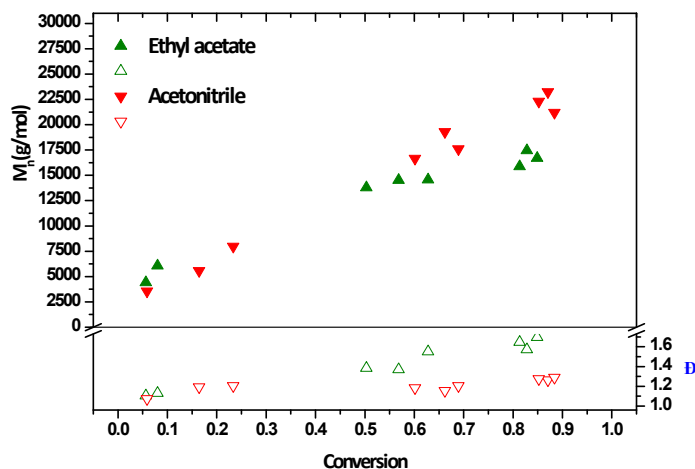

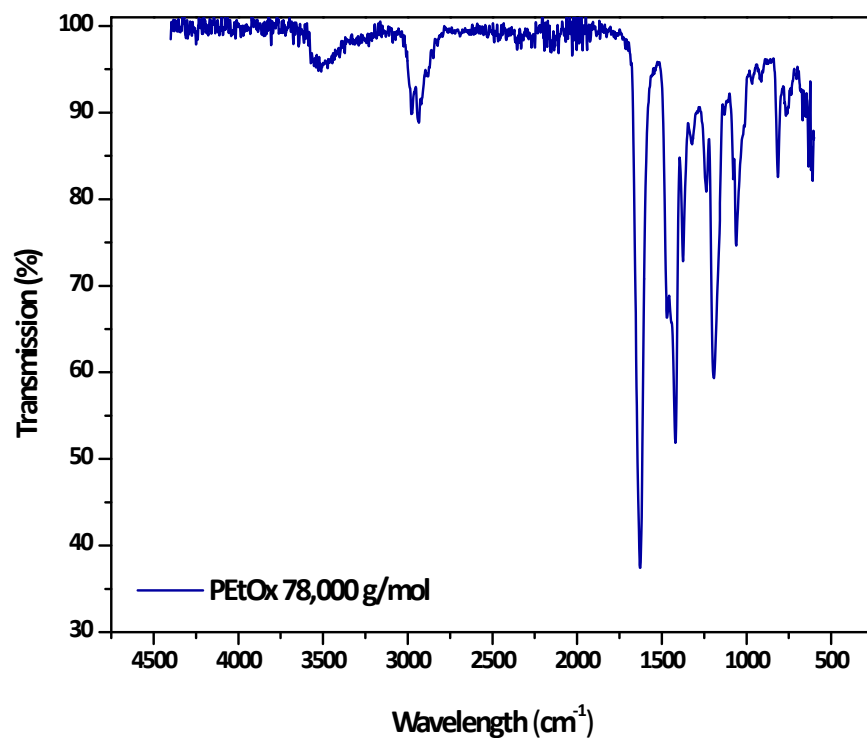

**SI Figure 3.** IR spectrum of the purified 78,000 g/mol PEOx polymer synthesized according the method described in the experimental part of the manuscript.

**SI Table 3:** Calculations for the kinetic study for the copolymerization of EtOx and C3MestOx in ethyl acetate and acetonitrile at 60 °C. M = monomer, I = initiator, s = solvent.

| M                          | [M]/[I] | Total [M] | V <sub>stock,tot</sub> | [I]   | Vol (I) | Vol (M1:M2) | V(s) |
|----------------------------|---------|-----------|------------------------|-------|---------|-------------|------|
| name                       | ratio   | mol/L     | mL                     | mol/L | mL      | mL          | mL   |
| EtOx (M1):<br>C3MestOx(M2) | 270:30  | 4.8       | 12                     | 0.016 | 0.112   | 5.23 : 0.86 | 5.91 |

#### SI references

- 1 F. P. Byrne, S. Jin, G. Paggiola, T. H. M. Petchey, J. H. Clark, T. J. Farmer, A. J. Hunt, C. Robert McElroy and J. Sherwood, *Sustain. Chem. Process.*, 2016, **4**, 7.
